# Supplementary material
Source: Springer Nature journal article supplement (https://www.springermedizin.de/resource/supplementary/12885_2007_1133_MOESM1_ESM.pdf/9471192)

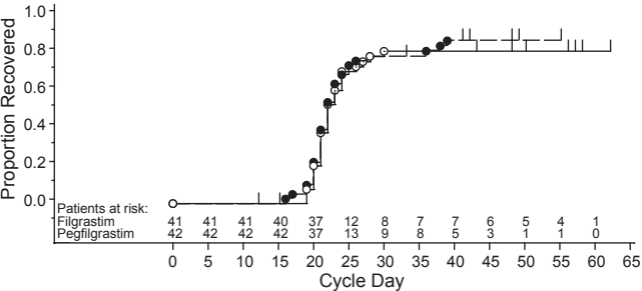

○—○ Filgrastim 5 µg/kg/day

●—● Pegfilgrastim 6 mg SC

Vertical lines ( | ) represent censored patients.

Supplement: MOESM1 [file 9471192]
